# Supplementary material for: Enhancement of Titania Photoanode Performance by Sandwiching Copper between Two Titania Layers
Source: MDPI journal article supplement (doi:10.3390/ma13194326), 2020-09-28
Supplement: s1 [file s1]

Supplementary

# Enhancement of Titania Photoanode Performance by Sandwiching Copper between Two Titania Layers

Fan Yang <sup>1,2</sup>, Ruizhuang Yang <sup>1</sup>, Lin Yan <sup>1</sup>, Jiankun Wu <sup>1</sup>, Xiaolin Liu <sup>1,2</sup>, Lirong Yang <sup>1</sup>, Minglong Zhong <sup>1</sup>, Xuan Luo <sup>1,\*</sup> and Lin Zhang <sup>1,2</sup>

<sup>1</sup> Research Center of Laser Fusion, China Academy of Engineering Physics, Mianyang 621900, China; yangf711@mail.ustc.edu.cn (F.Y.); rzyang99@mail.ustc.edu.cn (R.Y.); yanlin77@mail.ustc.edu.cn (L.Y.); wujiankun19@163.com (J.W.); lxl91003@mail.ustc.edu.cn (X.L.); yanglirong83@163.com (L.Y.); 13110200008@fudan.edu.cn (M.Z.); zhanglin@caep.cn (L.Z.)

<sup>2</sup> Department of Physics, University of Science and Technology of China, Hefei 230026, China

\* Correspondence: luoxuan@caep.cn

Received: 6 August 2020; Accepted: 10 September 2020; Published: date

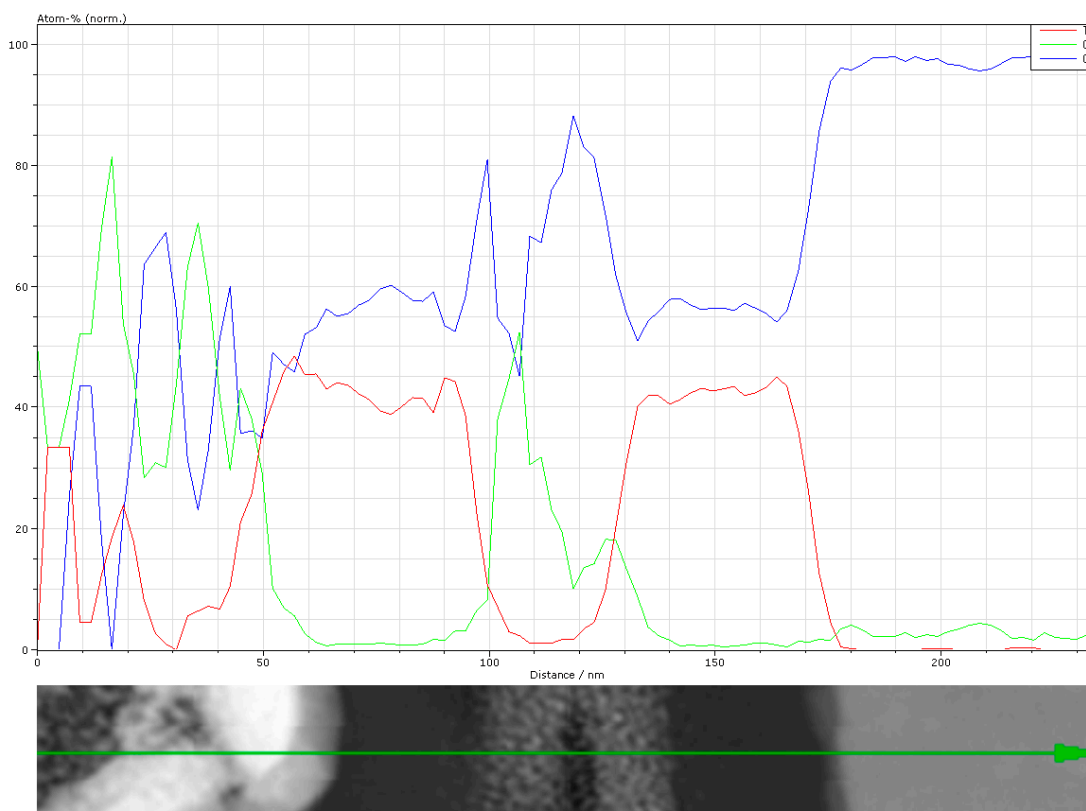

**Figure S1.** the atomic dispersion of TCT-4 from the line scanning model.

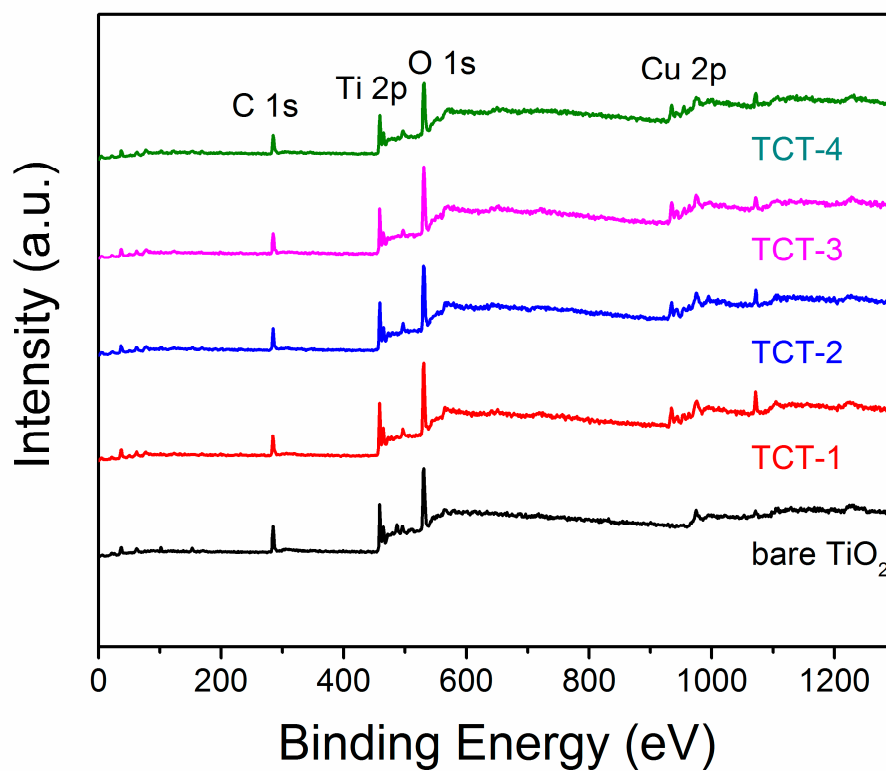

**Figure S2.** XPS survey spectra of bare TiO<sub>2</sub> and all TCT samples respectively.

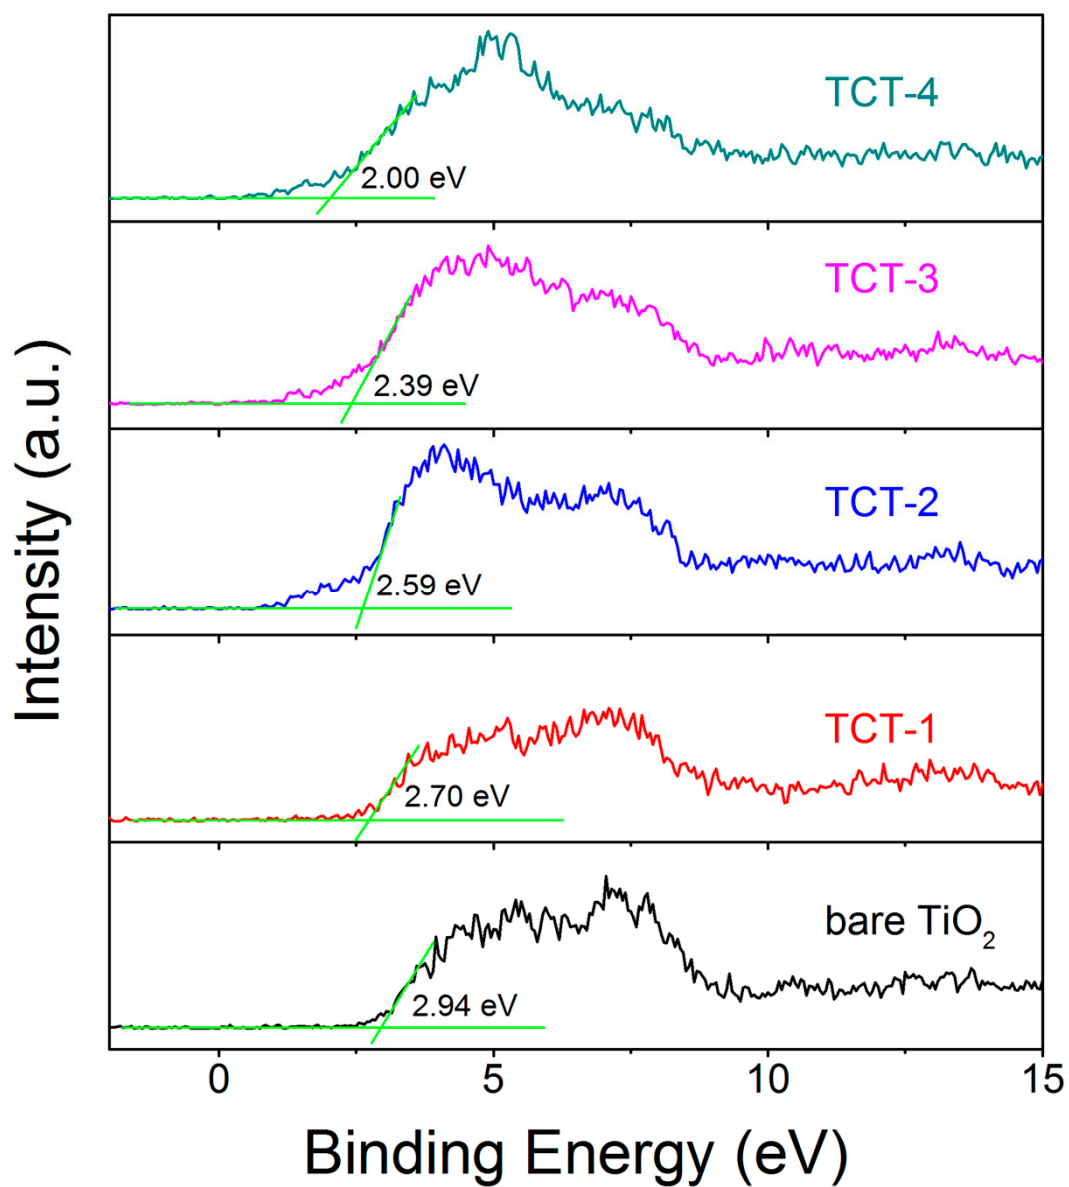

Figure S3. XPS Valence band spectra of bare  $\text{TiO}_2$  and all TCT samples respectively.

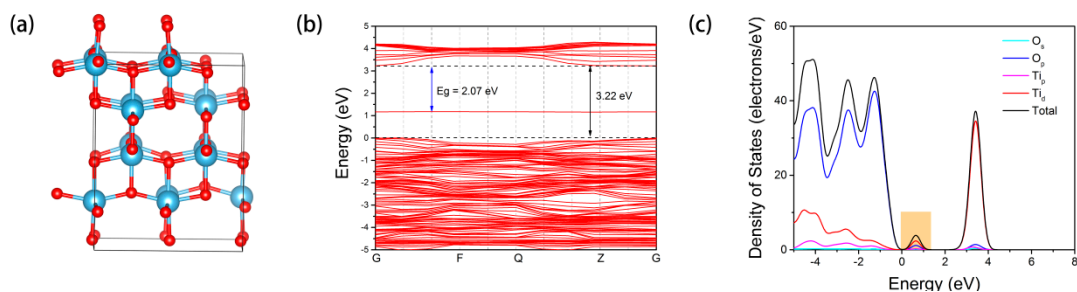

Figure S4. The lattice structure, calculated band structure and density of states (DOS) of  $\text{TiO}_2\text{-Vo}$ .

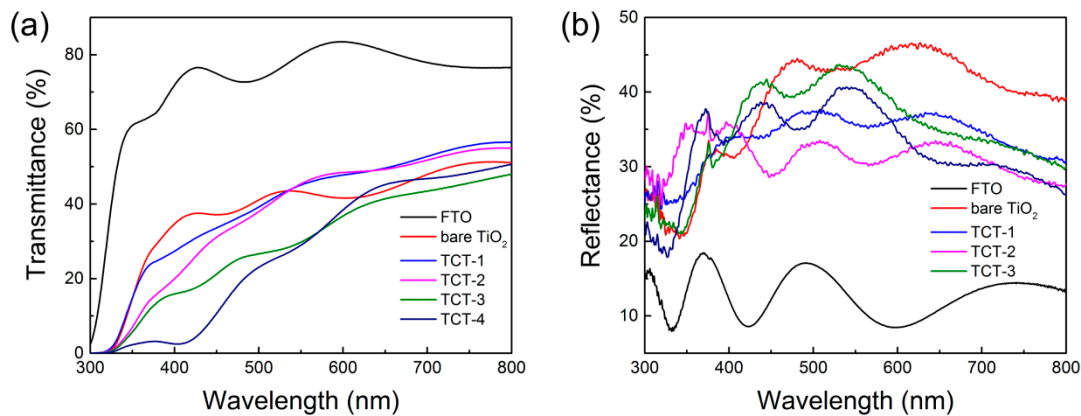

**Figure S5.** The transmittance (a) and reflectance; (b) of five samples from UV-vis measurement.

The absorbance spectra was calculated by the Equation:

$$A = 1 - T - R \quad (1)$$

Calculations

The IPCE can be calculated by the Equation:

$$\text{IPCE}(\%) = (1240 \times J_{ph}) / (\lambda \times P_{in}) \quad (2)$$

where  $J_{ph}$  is the measured photocurrent density of the experimental sample,  $\lambda$  is the wavelength and  $P_{in}$  is the intensity of the incident light.

Mott-schottky Equation:

$$\frac{1}{C^2} = \frac{2}{N_D e \epsilon_0 \epsilon} (E - E_{FB} - \frac{kT}{e}) \quad (3)$$

Where  $C$  is the capacitance,  $N_D$  is the charge carrier density,  $e$  is the elemental charge,  $\epsilon$  is the relative permittivity of material,  $\epsilon_0$  is vacuum permittivity,  $E$  is the applied potential in electrochemical measurement,  $E_{FB}$  is the flat band potential,  $k$  is the Boltzman constant and  $T$  is measurement temperature.

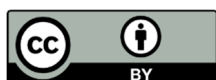

© 2020 by the authors. Submitted for possible open access publication under the terms and conditions of the Creative Commons Attribution (CC BY) license (<http://creativecommons.org/licenses/by/4.0/>).
